1 **Revised**

2

3

4

5

6

7 **Fatiguing stimulation of one skeletal muscle triggers**

8 **heat shock proteins activation in several rat organs: the role of muscle**

9 **innervation**

10

11

12 Yves Jammes<sup>1</sup>, Jean Guillaume Steinberg<sup>1</sup>, Youlet By<sup>1</sup>, Christelle Brerro-Saby<sup>2</sup>, Jocelyne

13 Condo<sup>1</sup>, Marine Olivier<sup>2</sup>, Regis Guieu<sup>1</sup>, and Stephane Delliaux<sup>1</sup>.

14

15

16 1- UMR MD2, Faculty of Medicine, Aix-Marseille University, Marseille, France.

17 2 - Ecole de Podologie, Marseille, France

18 **Corresponding author:** Pr. Yves Jammes,

19 UMR MD2, Faculty of Medicine, Aix-Marseille University, Bd. Pierre Dramard, 13916

20 cedex 20 , Marseille, France

21 Email : [yves.jammes@univ-amu.fr](mailto:yves.jammes@univ-amu.fr); Phone : 33 4 91 69 89 25 ; Fax : 33 4 91 69 89 27

22

23 **Running title:** Spread out HSP response to fatigue

24 **Line number: 457 without references / 577 references included**

25 **Summary**

26 We hypothesized that muscle afferents activation by fatigue may trigger a spread out  
27 activation of heat shock proteins (HSP) in resting muscles and different organs.

28 In anesthetized rats, HSP25 and HSP70 levels were determined in both *tibialis anterior*  
29 (TA) and *extensor digitorum longus* (EDL) muscles, diaphragm, kidney, and brain using  
30 ELISA kits, which mostly explore the phosphorylated HSP, and Western blotting (WB).

31 One TA muscle was electrically stimulated and tissues sampled 10 (Test10) or 60 min  
32 (Test60) after the stimulation had ended. The nerve supply to the stimulated TA or its pair  
33 in the contralateral limb was left intact or suppressed. In control rats, no muscle stimulation  
34 was performed and tissues were sampled at the same time (C10 and C60).

35 After TA stimulation, ELISA measured increased HSP25 content in contralateral TA,  
36 EDL, and diaphragm at Test 10 but not Test 60, and HSP70 increased in all sampled  
37 tissues at Test60. WB did not measure HSP25 and HSP70 variations at Test 10 while at  
38 Test 60 HSP25 increased in all sampled tissues except the brain and HSP70 was elevated  
39 in all tissues. Denervation of the contralateral non stimulated limb suppressed HSP  
40 variations in TA and after denervation of the stimulated TA the spread out activation of  
41 HSPs in other organ was absent.

42 Our data suggest that fatigue-induced activation of skeletal muscle afferents triggers an  
43 early increase in phosphorylated HSP25 in muscles and a delayed elevation of non  
44 phosphorylated HSP25 and HSP70 in skeletal and respiratory muscles, kidney, and brain.

45

46 **Key words:** Muscle fatigue – Heat shock proteins – Muscle afferents – Oxidative stress

47

48 **List of abbreviations:**

49

50 EDL: *extensor digitorum longus* muscle

51 EDTA: ethylenediaminetetraacetic acid

52 ELISA: enzyme-linked immunosorbent assay

53 HSP: heat shock protein

54 Ig: immunoglobulin

55 NMDA: N-methyl D-aspartic acid

56 PMSF: phenylmethylsulfonyl fluoride

57 RAA: reduced ascorbic acid

58 TA: *tibialis anterior* muscle

59 TBARS: thiobarbituric acid reactive substances

60 TCA: trichloroacetic acid

61 VO<sub>2</sub>max: maximal oxygen uptake

62 WB: western blotting

63

## 64 **Introduction**

65           The exercise-induced expression of heat shock proteins (HSP) in skeletal muscle is  
66 well documented in rodents (Huey et al., 2010; Locke et al., 1990; McArdle et al., 2001;  
67 Skidmore et al., 1995) and also humans (Morton et al., 2006; Paulsen et al., 2007; Tupling  
68 et al., 2007). Increased plasma HSPs levels after static (Brerro-Saby et al., 2010) and  
69 dynamic exercise (Jammes et al., 2009) also occurs in healthy subjects. HSP functions to  
70 protect the cell against the oxidative stress and provide protection against future insults  
71 (McArdle et al., 2002).

72           Human observations suggest the existence of an extra-muscular origin of the  
73 exercise-induced increase in plasma HSP level. Walsh et al. (2001) have reported that the  
74 elevated plasma HSP72 level after a strenuous exercise preceded the increase in HSP72  
75 gene and protein expression in sampled working muscle. Another observation by Lancaster  
76 and coworkers (2004) suggested a possible release of HSP72 from the brain following 180  
77 min of cycling at 60%  $VO_2$ max.

78           Data support the hypothesis of a role played by the nervous system in HSPs  
79 activation. Indeed, in the central nervous system the glutamate mediates HSP70 expression  
80 in the hippocampus (Ayala et al., 2003) and NMDA-receptor antagonists cause HSP70  
81 expression in the cortex (Hashimoto et al., 1997). Also in the peripheral nervous system,  
82 norepinephrine stimulates the release of exomes containing HSP72 through the activation  
83 of adrenergic receptors (Johnson et al., 2005). Other studies have shown that the muscle  
84 nerve supply modulates the HSP expression in resting muscle (Huey et al., 2005; Kato et  
85 al., 2002).

86           The candidates for the spread out activation of HSPs might be the groups III and IV  
87 muscle nerve afferents, also called the “metaboreceptors”, because they are activated by  
88 stressors responsible for the HSPs expression, i.e., muscle contraction at a high strength,

89 hypoxia, ischemia, and the reactive oxygen species (Darques and Jammes, 1997;  
90 Decherchi et al., 1998; Delliaux et al., 2009; Rotto and Kaufman, 1988). The sensory  
91 pathways carried by the groups III and IV muscle afferents control the circulatory response  
92 to fatiguing muscle contractions through a general sympathetic activation (Kaufman and  
93 Hayes, 2002) and modulate the motor drive not only of the working muscles but also of  
94 resting ones through their spinal and supraspinal projections (Degtyarenko and Kaufman  
95 MP, 2002; Ling et al., 2003). In a recent review (Whitham and Fortes, 2008), it was  
96 hypothesized that the muscle metaboreflex might participate to a general HSP production  
97 but the role of muscle afferents in triggering the HSP production has never been  
98 investigated.

99 We speculated that the activation of muscle afferents by fatiguing exercise may  
100 trigger a HSP response in non contracting skeletal and respiratory muscles and major  
101 organs as the kidney and brain. The presence of a spread out activation of chaperone  
102 proteins after leg exercise might have a high clinical significance in sport and rehabilitation  
103 medicine. Thus, the benefits of exercise would not be limited to the working muscles and  
104 might concern the whole body.

105 In the present study, we tested the hypothesis that rhythmic electrical stimulation of  
106 one skeletal muscle, eliciting a fatiguing exercise, might produce a nerve signal able to  
107 trigger an activation of HSP in contralateral resting muscles (*tibialis anterior*, TA, and  
108 *extensor digitorum longus*, EDL), a respiratory muscle (diaphragm), and major organs  
109 (kidney and brain). We explored different situations in which the nerves supplying the  
110 stimulated or the contralateral resting muscles were left intact or sectioned. We also  
111 verified that our protocol of electrically-induced muscle fatigue elicited an oxidative stress,  
112 a potent stimulus for the group IV muscle afferents (Delliaux et al., 2009). The HSP25 and  
113 HSP70 content in the different tissues was measured using Western blotting (WB) and

114 enzyme-linked immunosorbent assays (ELISA) which explored the activation of non  
115 phosphorylated and phosphorylated HSPs, respectively.

116

## 117 **Methods**

118 *Ethical approval.*

119 Animal experiments were performed in 114 adult (8-10 weeks-old, 300-405 g) Sprague-  
120 Dawley rats (Iffa-Credo, Les Oncins, France). The protocol was approved by the “Jean  
121 Roche Research Institute” ethics committee of our faculty under the licence number C 13-  
122 055-8. All experiments, including surgery, monitoring, and euthanasia, were conducted by  
123 physiologists authorized to perform animal surgery.

124 *Animal care and general preparation.*

125 The rats were anesthetized by an intra-peritoneal injection of sodium pentobarbital  
126 (Nembutal, 40mg.kg<sup>-1</sup>, Sanofi-Aventis, France). The common carotid artery was  
127 cannulated to continuously measure arterial blood pressure with an electromanometer  
128 (Gould Statham P23 Db, Hato Rey, PR, USA). The animals were ventilated at constant  
129 volume (10 ml.kg<sup>-1</sup>) and frequency (50 min<sup>-1</sup>) with a Harvard volumetric pump. The  
130 inhaled gas mixture was 30% O<sub>2</sub> and 70% N<sub>2</sub>. End-tidal O<sub>2</sub> and CO<sub>2</sub> fractions were  
131 respectively measured with rapid pyrolytic (Gauthier, France) and infrared gas analysers  
132 (Godart, Netherlands). A heating pad maintained the rectal temperature in the range 37° to  
133 38°C. Throughout and after the operative procedure, the adequacy of the level of  
134 anesthesia was judged from the changes in blood pressure and heart rate and the absence of  
135 the corneal reflex and response to pain stimuli applied on the adipose pad of the animal’s  
136 paw. The changes in circulatory variables and the re-appearance of reflex responses  
137 governed the injection of supplementary doses of pentobarbital sodium. At rest, the mean  
138 blood pressure remained stable (10<sup>th</sup> min: 128 + 8 mmHg; 60<sup>th</sup> min: 118 + 5 mmHg). At

139 the end of the experiments, after sampling the muscles and kidney the rats were killed by  
140 an intra arterial injection of a hyperosmolar potassium chloride solution. Then, the brain  
141 was sampled as a whole.

142 *Experimental design.*

143 *Four* groups of rats were studied. In the three first groups, both TA muscles, the  
144 contralateral EDL muscle, the diaphragm, kidney, and brain were sampled 10 min or 60  
145 min after the blood pressure had stabilized (Controls) and after the electrical stimulation  
146 had stopped (Tests).

147 - *Controls* (N = 48): resting oxidant/antioxidant status and HSP25 and HSP70 levels were  
148 determined in anesthetized rats whose the TA muscle was not stimulated. In an equal  
149 proportion of rats, the nerve supply to both TA muscles was left intact or an unilateral  
150 transection of the peroneal and sciatic nerves was performed. In each series (innervated or  
151 denervated TA), all tissues were sampled at the 10<sup>th</sup> min or 60<sup>th</sup> min (C10, C60). These  
152 control series served to determine if: 1) the prolongation of anesthesia might constitute a  
153 stress influencing the HSP level and 2) the unilateral nerve section might affect the HSP  
154 content.

155 - *Tests*

156 \* *Stimulation of an innervated TA muscle* (N = 28): the peroneal and sciatic nerves were  
157 left intact.

158 \* *Stimulation of a denervated TA muscle* (N = 28): both the peroneal and sciatic nerves  
159 were dissected then sectioned, and after a 10-min rest period, the homolateral TA muscle  
160 was stimulated.

161 \* *Stimulation of an innervated TA muscle while the contralateral TA muscle was*  
162 *denervated* (N = 10). Sampling was limited to both TA muscles.

163 In all rats, HSPs content was determined by immunoassay (ELISA). Western blotting was  
164 used to confirm the HSP changes in 7 animals in each group.

165 Samples at the 10<sup>th</sup> and 60<sup>th</sup> min of stimulated TA were denominated St10 and St60,  
166 respectively, and of contralateral TA Contra 10 and Contra 60. Samples of other tissues  
167 (EDL, diaphragm, kidney, and brain) after TA stimulation were called Test 10 and Test 60.

168 *Electrically-induced muscle fatigue.*

169 As in our previous animal studies (Darques and Jammes, 1997; Decherchi et al., 1998;  
170 Dellioux et al., 2009), muscle stimulation consisted in rhythmic contractions of the *tibialis*  
171 *anterior* muscle with the blood vessels intact. Two steel hook electrodes (inter-electrode  
172 distance 4 mm) were fixed in the belly of the muscle and contractions were produced by a  
173 neurostimulator through an isolation unit (Grass S8800, Quincy, MA, USA). Trains of  
174 rectangular pulses were delivered for a 10-min period (1-ms pulse duration; 10 Hz  
175 stimulation frequency; train duration: 500 ms; 1000-ms rest period between two successive  
176 trains). In all cases, the voltage was twice that evoking the maximal force (maximal  
177 voltage: 18 V). This pattern of stimulation frequency was chosen because it was known to  
178 elicit the highest metabolic changes (Darques et al., 2003), the strongest activation of the  
179 group IV muscle afferents (Darques and Jammes, 1997), and significant circulatory and  
180 respiratory responses (Decherchi et al., 2007). To measure the force output, the distal  
181 tendon was attached to an isometric strain gauge (Myograph F-60, Narco-Bio systems,  
182 Houston, TX, U.S.A). Muscle fatigue always occurred during the 10-min muscle  
183 stimulation and the maximal fall of peak force ( $0.53 \pm 0.04$  N) was  $65 \pm 8$  %. To be  
184 ensured that the unilateral electrical muscle stimulation did not elicit a contraction of  
185 contralateral muscles, in seven animals we simultaneously recorded the muscle force in  
186 both TA muscles. In these rats, the “pressor reflex” was measured from the arterial blood  
187 pressure recording. Figure 1 shows the changes in muscle force and arterial blood pressure



188 during a 10-min muscle stimulation of an intact (upper part), then a denervated TA muscle  
189 (lower part).

190 *Organ sampling and biochemical analyses*

191 Immediately after sample collection, both TA muscles, the contralateral EDL, the  
192 diaphragm, kidneys, and brain were cut in several aliquots (each aliquot corresponding to a  
193 specific assay) which were frozen in liquid nitrogen and then stored at -80°C until  
194 biochemical analyses. As in a previous rat study (Steinberg et al., 2004), the muscle  
195 concentration of two indicators of the oxidant/antioxidant status were measured: the  
196 thiobarbituric acid reactive substances (TBARS), and an endogenous antioxidant, the  
197 reduced ascorbic acid (RAA) present in rat hindlimb muscles (Graf et al., 1965; Wilson et  
198 al., 1996). Muscle extracts were homogenized in 5% trichloroacetic acid (TCA)  
199 according to a ¼ weight/volume ratio with Ultra-Turrax T25 basic disperser (Ika-Werke,  
200 Staufen, Germany) at 24 000 rpm. The resultant mixtures were then centrifuged (10 000 g)  
201 at 4°C for 15 min, and the TBARS and RAA levels were measured in supernatants. The  
202 muscle TBARS level was assessed according to the spectrofluorometric method by  
203 Uchiyama and Mihara (1978). In test tubes containing 200 µl of 5% TCA supernatants, we  
204 added successively 200 µl of 8.1% sodium dodecylsulfate, 1.5 ml of 20% acetate buffer  
205 (pH 3.5), 1.5 ml of freshly prepared 0.8% thiobarbituric acid and 400 µl of an ethanolic  
206 solution of 0.1% butylated hydroxytoluene. The test tubes containing glass beads were  
207 heated at 100°C for 60 min and then cooled in tap water at room temperature. Then, we  
208 added 4 ml of n-butanol and 1 ml of water in each tube. After vortexing for 5 min., the  
209 mixture was centrifuged (2000 g) for 3 min to obtain a rapid separation between organic  
210 and aqueous phases. The upper organic phase was pipetted off and the pink pigment was  
211 measured using a spectrofluorometer at an excitation wavelength of 515 nm and an  
212 emission wavelength of 553 nm (SHIMADZU model RF-5031 PC, Kyoto, Japan). A

213 standard curve of TBARS was obtained after overnight hydrolysis at room temperature of  
214 a solution containing 1 mmol of tetraethoxypropane (Sigma-Aldrich Co., Saint Quentin  
215 Fallavier, France) in 100 ml of 0.1N HCl. The muscle RAA levels were estimated by  
216 spectrophotometry using the method based on the reduction of iron by ascorbic acid in the  
217 presence of orthophosphoric acid and  $\alpha$ - $\alpha'$  dipyridyl (Maickel, 1960). In a test tube  
218 containing 200  $\mu$ l of muscle extract in 5% TCA, we added 60  $\mu$ l of 0.5% orthophosphoric  
219 acid, 1 ml of 0.5%  $\alpha$ - $\alpha'$  dipyridyl and 200  $\mu$ l of 1% ferric chloride. After vortexing, the  
220 mixture was left for 10 min at room temperature in the dark. The optical density was  
221 measured at 525 nm on a spectrophotometer (Helios  $\gamma$ , Milton Roy Company, Rochester,  
222 New York). A freshly-prepared standard curve was obtained with ascorbic acid in 5%  
223 trichloroacetic acid.

#### 224 *Immunoassays.*

225 The HSP content in cell lysates of sampled muscles were reported to the total protein  
226 content. Muscle aliquots were homogenized on ice in cold phosphate buffer saline, pH  
227 7.3, containing 0.5% Triton X100, 18.6 g/l EDTA, 0.1 mM PMSF and 1  $\mu$ g/ml of  
228 Complete Mini Protease Inhibitor Cocktail tablets with leupeptin, aprotinin and pepstatine  
229 (Roche Diagnostics, Meylan, France) according to a 1/4 weight/volume ratio with an Ultra-  
230 Turrax T25 basic disperser (Ika-Werke, Staufen, Germany) at 24 000 rpm. The resultant  
231 mixtures were then centrifuged (10 000 g) at 4°C for 15 min and the total protein content,  
232 and the phosphorylated HSP25 and HSP70 levels were measured in the supernatants.  
233 The total muscle protein content was estimated by spectrophotometry using the Pierce  
234 BCA Protein Assay Kit (Thermo Scientific, Rockford, IL). This method is based on the  
235 reduction of  $\text{Cu}^{++}$  in  $\text{Cu}^+$  in the presence of bicinchoninic acid and proteins in alkaline  
236 medium. The resulting chromophore exhibits a characteristic purple color at 562 nm. A  
237 Bovine Serum Albumine (BSA) allows the measurement of total protein content (mg

238 protein.g<sup>-1</sup> of wet tissue). Phosphorylated HSP25 and HSP70 levels were determined with  
239 high-sensitive enzyme-linked immunosorbent assay ELISA kits dedicated to HSP  
240 measurements in rat tissues (Using polyclonal antibodies IgG against HSP25  
241 phosphorylated at Ser 82 and anti phospho HSP 70, phosphorylated at Tyr 525; Genway  
242 GWB-E2BCBF). All measurements were made in duplicate by spectrophotometry on a  
243 Statfax 3200 micoplate reader (Awareness Technology, Inc., Palm City, FL, USA) using a  
244 point-by-point method which allows a better estimation of the HSPs levels. HSP25 levels  
245 were measured with the ImmunoSet HSP25 (rodent) ELISA development set from Enzo  
246 Life Sciences (supplied by Covalab S.A.S., Villeurbanne, France). The limits of detection  
247 of the assay were 0.44 ng.ml<sup>-1</sup> and 0.78 ng.ml<sup>-1</sup> for HSP 25 and HSP70, respectively. The  
248 HSP25 and the HSP70 levels were expressed in ng.mg<sup>-1</sup> of protein content.

#### 249 *Antibodies and Western blotting.*

250 Primary mouse monoclonal antibodies specific for rat HSP25 (ADI-SPA-800) and HSP70  
251 (ADI-SPA-810) were obtained from Enzo Life Sciences (Villeurbanne, France). Western  
252 blotting procedure as previously described (By et al., 2010). Tissues from rat were  
253 immediately freezed at -20°C, lyophilised, crushed, and solubilised  
254 with 4% SDS aqueous solution. After centrifugation (10.000 x g) for 10 min at room  
255 temperature, the pellet was discarded and the protein content of solubilisate was tested by  
256 Pierce BCA Protein Assay Kit (Thermo Scientific, Rockford, IL). 60 µg of muscle  
257 solubilisate were diluted in 62.5 mM Tris-HCl buffer, pH 8.3, containing 2% SDS, 10%  
258 glycerol, 0.01% bromophenol blue and 5% mercaptoethanol, sonicated for 10 min at 47  
259 kHz and subjected to standard electrophoresis procedure in Mini Protean II system (Bio-  
260 Rad, Hercules, CA). Separated proteins in 12% acrylamide minigel were transferred onto a  
261 PVDF membrane. Blotted membrane was placed into the blot holder of the protein  
262 detection system (Millipore, Billerica, MA), saturated with non fat dried milk and

263 incubated 20 min with 1/1000 dilution of primary mouse monoclonal antibodies, anti-  
264 HSP25 and anti-HSP70. Blots were visualized by horse-radish peroxidase labelled anti-  
265 mouse IgG Fab specific antibodies and enhanced chemiluminescent substrate (SuperSignal  
266 West Femto, Pierce Biotechnology, Rockford, IL) using a Kodak Image Station 440CF  
267 (Eastman Kodak Company, Rochester, NY). The staining intensities of the bands were  
268 densitometrically measured with the public domain NIH Image software developed at the  
269 US National Institutes of Health.

270 *Data analyses.*

271 Values are expressed as their mean + one SEM. We used a two-way analysis of variance to  
272 evaluate at the same time (10 or 60 min), in each situation, the changes in HSP levels  
273 elicited in the stimulated TA muscle and the contralateral resting muscles (TA, EDL) and  
274 foreign tissues (diaphragm, kidney, brain) compared to the corresponding control levels.  
275 The first factor was the muscle status (stimulated vs. contralateral) and the second factor  
276 was the presence or absence of an unilateral muscle nerve section. A post-hoc Student-  
277 Newman-Keuls test indicated the direction and the magnitude of the variations between the  
278 different conditions. Data processing was realized on absolute HSP level values with  
279 software (SigmaStat, Jandel, Chicago, Illinois). Difference was accepted as significant if  
280  $p < 0.05$ . Regression analysis was used to search for relationships between the HSP changes  
281 in the contralateral TA and the magnitude of force decay (i.e., fatigue) in the stimulated  
282 TA.

283

## 284 **Results**

285 *Control HSPs levels.*

286 Table 1 shows control values of HSP25 and HSP70 measured by ELISA in resting TA  
287 muscles and the different sampled tissues. We noted significant elevation of both HSP25

288 and HSP70 in TA and EDL sampled at the 60<sup>th</sup> min but this effect of time was not found in  
289 the other tissues. We noted that TA had the lowest HSP25 content. The section of one limb  
290 muscle nerve significantly increased the HSP25 and HSP70 levels in TA and EDL sampled  
291 at the 10<sup>th</sup> min but these differences no longer persisted at the 60<sup>th</sup> min. The nerve section  
292 had no effect on the HSP content in the diaphragm, kidney, and brain. Western blotting  
293 indicated that TA denervation significantly reduced total HSP25 (5.10 + 0.35 % vs. 7.90 +  
294 0.38 %;  $p < 0.01$ ) and HSP70 contents (5.95 + 1.0 vs. 7.71 + 1.02;  $p < 0.05$ ) at the 10<sup>th</sup> min  
295 only and had no effect on HSPs contents in the other tissues. It was noted that the unilateral  
296 hind limb denervation elicited a transient (10 min), significant increase in the mean blood  
297 pressure (+ 12 + 5%;  $p < 0.05$ ).

298 *Response to unilateral muscle stimulation.*

299 - *Accompanying changes in physiological variables* (Fig. 1): during muscle stimulation, no  
300 change in force was measured in the contralateral TA muscle. A modest but significant  
301 elevation of the mean arterial blood pressure (+ 18 + 4%;  $p < 0.01$ ) was present in the  
302 innervated TA preparation but not when the denervated TA was stimulated.

303 - *Fatigue-induced oxidative stress*: in both the innervated and denervated stimulated TA an  
304 oxidative stress, combining increased TBARS level and reduced RAA content, was  
305 measured 10 min after the stimulation bout had ended while a TBARS increase was only  
306 noted at the 60<sup>th</sup> min (Fig. 2). As shown in Fig. 2, no changes in TBARS and RAA levels  
307 were measured in contralateral resting TA muscles.

308 - *Fatigue-induced HSPs variations in TA muscles*: in the innervated (Figs. 3A and 3E) or  
309 denervated (Fig. 3C) stimulated TA, the HSP content significantly increased but the time  
310 course of HSP25 and HSP70 changes differed: the peak HSP25 culminated at the 10<sup>th</sup> min,  
311 then disappeared, while the HSP70 response progressed at the 60<sup>th</sup> min (Figs. 3A and 3E).  
312 The stimulation of the innervated TA also increased the HSP levels in the contralateral

313 resting TA and the time course of HSP variations followed that described in the stimulated  
314 muscle (Fig. 3B). After denervation of the stimulated TA (Fig. 3D) or of the contralateral  
315 hind limb only (Fig. 3F) no significant changes in HSP levels were noted in the  
316 contralateral resting TA. The HSP25 content in the contralateral innervated TA sampled at  
317 the 10<sup>th</sup> min increased in proportion of the force decay measured in the stimulated muscle  
318 (Fig. 4). We did not find any correlation between the HSP70 content and the force decay.

319 - *Fatigue-induced HSPs changes in other tissues:* Fig. 5 shows that the stimulation of an  
320 innervated TA induced a significant early and transient increase in phosphorylated HSP25  
321 content, which is the active form, in the contralateral EDL muscle and the diaphragm. The  
322 HSP70 content was significantly elevated at the 60<sup>th</sup> min in all tissues (EDL, diaphragm,  
323 kidney, and brain). After limb denervation, the TA stimulation no more induced HSP  
324 changes in all sampled tissues.

325 Western blotting showed that the HSP25 response to the stimulated innervated TA  
326 muscle slightly differed from those given by ELISA. Indeed, Figure 7 shows that Western  
327 blotting did not measure an early HSP25 increase at the 10<sup>th</sup> min in the different tissues but  
328 only a significant HSP25 elevation in contralateral TA, EDL, and diaphragm sampled at  
329 the 60<sup>th</sup> min. As ELISA, Western blotting measured a significant HSP70 increase in all  
330 tissues sampled at the 60<sup>th</sup> min but not at the 10<sup>th</sup> min. Despite these differences, Western  
331 blotting confirmed the suppression of HSP25 and HSP70 responses to TA stimulation  
332 when the stimulated TA was denervated (Figs. 6 and 7).

333

## 334 **Discussion**

335 The present study shows that with an intact nerve supply to both TA muscles, a 10-  
336 min fatiguing stimulation to one TA efficiently elicits a “pressor” reflex (Fig. 1) and an  
337 oxidative stress in that muscle (Fig. 2), increases the total HSP25 and HSP70 proteins

338 levels in both TA muscles (Fig. 3), contralateral EDL muscle, diaphragm, kidney and brain  
339 (Fig. 5). ELISA revealed that the phosphorylated HSP25 transiently increased in  
340 contralateral TA, EDL, and diaphragm 10 min after the stimulation had stopped and both  
341 ELISA (Fig. 5) and Western blotting (Fig. 7) showed elevated levels of HSP25 and HSP70  
342 in all tissues sampled at the 60<sup>th</sup> min. After denervation of the contralateral hind limb, HSP  
343 levels continued to increase in the stimulated TA but the HSP response to TA stimulation  
344 no more occurred in the contralateral resting TA (Figs. 3 and 7). Denervation of the  
345 stimulated TA suppressed the HSP changes in all sampled tissues (Figs. 5 and 7).  
346 Together, these data suggest that the activation of muscle nerve afferents by a fatiguing  
347 stimulation participates to a HSP response in skeletal and respiratory muscles and also in  
348 the kidney and brain. In resting preparations, the denervation of hind limb muscles  
349 transiently increased the phosphorylated HSP25 and HSP70 content in TA and EDL but  
350 not in the diaphragm, kidney, and brain (Table 1). On the opposite, Western blotting  
351 indicated significant decrease in total HSP25 and HSP70 levels in the denervated TA. This  
352 observation strongly suggests that muscle nerve pathways might play key role in baseline  
353 HSP regulation. The very early increase in HSP25 level can not result from an increase in  
354 protein synthesis, which needs at least one hour, but must be secondary to the HSP  
355 activation by phosphorylation. Indeed, our immunologic methods evaluate the  
356 phosphorylated (activated) form of HSP. Our results indicate that this activation occurs in  
357 the few minutes following muscle stimulation.

358         The purpose of our study was only to demonstrate the existence of fatigue-induced  
359 HSP activation in non stimulated tissues and the involvement of afferent nerve pathways in  
360 this response. We did not focus our study on HSP translocation between the different cell  
361 compartments (cytosol, cytoskeleton) and/or mRNA synthesis (translational response)  
362 which needs several hours to be significant. Also, we did not examine the potential sources

363 for the HSP activation that are the nerve terminals, blood vessels, and the muscle fibres  
364 themselves. As in previous rat (Inaguma et al., 1993; Skidmore et al., 1995) and human  
365 studies (Bai et al., 2002; Huang et al., 2007; Matt et al., 2007), we used ELISA kits to  
366 measure the phosphorylated HSP contents in tissues. Our study was completed by  
367 measuring the changes in non phosphorylated HSP content using Western blotting. HSP  
368 phosphorylation rapidly occurs in response to a variety of stresses, including the hydrogen  
369 peroxide and other oxidants, and the phosphorylation status determines the capacity of  
370 HSP to interact with different apoptotic proteins (Schmitt et al., 2007). In the present study,  
371 ELISA and Western blotting revealed different responses to TA stimulation of HSP25 and  
372 HSP70. ELISA indicates that the phosphorylated HSP25 transiently increased at the 10<sup>th</sup>  
373 min in all the sampled tissues whereas the phosphorylated HSP70 content increased at the  
374 60<sup>th</sup> min. On the other hand, WB shows a delayed elevation of non phosphorylated HSP25  
375 and HSP70 in all the sampled tissues one hour after the fatiguing TA stimulation bout.  
376 Thus, muscle fatigue seems to trigger a rapid and transient increase in phosphorylated  
377 HSP25 in all the sampled tissues and a delayed increase in non phosphorylated HSPs. We  
378 did not find data in the literature on simultaneous measurements of phosphorylated and  
379 non phosphorylated HSPs in muscles. Indeed, most of previous studies used WB to  
380 measure the HSP content in muscle biopsies and reported a significant HSP70 elevation in  
381 working muscle 20 min (Locke et al., 1990) and 30 min (Skidmore et al., 1995) after a  
382 treadmill bout in rats and 30 min after an eccentric exercise in humans (Paulsen et al.,  
383 2007). ELISA measurements of plasma HSP27 and HSP70 contents were performed in  
384 healthy humans and reported an early elevation of the phosphorylated HSP27 10 min after  
385 maximal static handgrip (Brerero-Saby et al., 2010) and maximal cycling exercise (Jammes  
386 et al., 2009) while the phosphorylated HSP70 response began at the 60<sup>th</sup> min (Jammes et  
387 al., 2009). The early increase in phosphorylated HSP content in tissues might result from



388 their damage. This might occur in the stimulated TA muscle and could also concern the  
389 contralateral muscles if the electrical stimulation would spread over the contralateral limb.  
390 Because we demonstrated that no increase in muscle force and no oxidative stress were  
391 measurable in the contralateral TA during fatiguing stimulation of the pair muscle, any  
392 damage of the resting TA (and also probably EDL) can be discarded. Moreover, we also  
393 measured a significant increase in phosphorylated HSPs levels in the diaphragm, kidney,  
394 and brain after TA stimulation and there was no reason for any damage of these organs in  
395 stable anesthetized animal preparation. An increase in HSPs content could happen in  
396 hypoxic tissues during prolonged anesthesia. This could partly explain the increased HSP  
397 content in all sampled tissues at the 60<sup>th</sup> min. However, hypoxia-induced HSP changes  
398 should be also measured in our rats where the stimulated TA muscle was denervated and  
399 no significant HSPs variations were then measured. Thus, at the present time we can not  
400 propose any satisfactory explanation for the obtained differences between both ELISA and  
401 WB techniques.

402       Because the denervation of the stimulated TA abolished the HSP25 and HSP70  
403 changes in resting TA and other tissues, whatever the method used to measure the HSP  
404 content, we concluded that the activation of sensory nervous pathways arising from the  
405 working muscle was solely responsible for the HSP response to muscle stimulation.  
406 Moreover, the absence of HSP response in contralateral denervated TA muscle  
407 demonstrated the existence of a motor arm of this reflex loop. In the absence of rat series  
408 demonstrating the key role played by the muscle innervation in the HSP response to  
409 exercise, it would be tempting to speculate that the circulating catecholamines might  
410 explain the increase in HSP70 level in the different tissues. Indeed, it was already shown  
411 that the activation of alpha1-adrenoceptors resulted in a rapid increase in circulating  
412 HSP72 (Johnson et al., 2005). It must be noted that our protocol of muscle stimulation

413 elicited an increase in HSP70 level in all sampled tissues but solely an elevated HSP25  
414 content in skeletal (TA, EDL) and respiratory muscle, and the kidney but not in the brain.  
415 This suggests the existence of different mechanisms for the induction of HSP25 and  
416 HSP70 responses.

417         Electrophysiological studies in animals have documented that fatigue (Darques and  
418 Jammes, 1997; Decherchi et al., 1998) and also the reactive oxygen species (Delliaux et  
419 al., 2009) activate the muscle nerve endings connected to the groups III and IV afferents.  
420 The activation of these muscle afferents modifies the motor control to muscles (Garland  
421 and Kaufman, 1995) and activates the sympathetic pathways to peripheral vessels  
422 (Kaufman and Hayes, 2002; Rowell and O'Leary, 1990). In the present study, the  
423 stimulation of an innervated TA muscle elicited a modest but significant increase in the  
424 mean arterial blood pressure, an observation already reported in the same anesthetized rat  
425 model (Decherchi et al., 2007). The exercise-induced “pressor” reflex is not limited to limb  
426 muscles but also concerns the renal circulation (Koba et al., 2006) and this might explain  
427 our observation of a HSP response in muscles and kidney. We also here reported that the  
428 unilateral transection of the peroneal and sciatic nerves, which must transiently activates  
429 all nerve fibres, elicited a modest but significant increase in the mean arterial blood  
430 pressure (+ 12 + 5%). Thus, the aforementioned observations converge to show up that  
431 muscle nerve stimulation activates the sympathetic system in anesthetized rats.

432         The present study also demonstrates that the muscle innervation plays a key role in  
433 the baseline HSPs levels in resting muscles. Indeed, an unilateral nerve transection  
434 transiently increased the phosphorylated HSP25 and HSP70 levels but reduced the non  
435 phosphorylated HSP content in resting limb muscles (TA and EDL). It must be underlined  
436 that the effects of muscle denervation were localized to the hind limbs and absent in the  
437 other sampled tissues. The nerve section, which transiently increased the blood pressure,

438 must activate all the afferent pathways in the severed nerve, including those involved in  
439 reflex sympathetic activation. Nerve section also stimulates the axons contained in the  
440 distal portion of the nerve trunk, eliciting the release of different neurotransmitters  
441 including the norepinephrine. Only long term effects of muscle denervation on HSPs levels  
442 were reported in the literature. Huey et al. (2005) reported a significant decrease in  
443 phosphorylated HSP24 in denervated resting rat *plantaris* muscles sampled 1 to 28 days  
444 after nerve transection. Kato and co-workers (2002) also found that transection of the  
445 sciatic nerve trunk abolished the HSP27 response in disused muscles. The aforementioned  
446 studies, including ours, clearly showed the existence of nerve-activity dependent processes  
447 for an optimal HSP expression.

448         Our study shows that nerve pathways arising from an electrically stimulated muscle  
449 trigger HSP variations in contralateral resting skeletal muscles (TA, EDL), in respiratory  
450 muscle, and also in the kidney and brain. A very recent study in rat pups (Daniels et al.,  
451 2012), using proteomic analysis, reports that exercise training in adolescence counteracts  
452 the detrimental effects of maternal separation on the expression of chaperone proteins  
453 which protect the brain against the oxidative stress. Further studies are needed to precise  
454 the role played by the different muscle afferents and to verify the hypothesis of a  
455 participation of sympathetic activation in the HSP response to fatiguing muscle  
456 contraction. Anyway, the presence of spread out activation of chaperone proteins after leg  
457 exercise might have a high clinical significance in sport and rehabilitation medicine. It  
458 must be underlined that the exercise-induced phosphorylation of HSP, reported in the  
459 present study, might constitute a potential mechanism of controlling cytoskeletal assembly  
460 and remodeling (Ganote and Armstrong, 1993).

461

462

463 **References**

464

465 - Ayala, G.W. and Tapia, R. (2003). Expression of heat shock protein 70 induced by 4-  
466 aminopyridine through glutamate-mediated excitotoxic stress in rat hippocampus in vivo.  
467 *Neuropharmacology* **45**, 649-660.

468 - Bai, L., Koopmann, J., Fiola, C., Fournier, P., Schirmacher, V. (2002). Dendritic cells  
469 pulsed with viral oncolysates potently stimulate autologous T cells from cancer patients.  
470 *Int. J. Oncol.* **21**, 685-694

471 - Brerro-Saby, C., Delliaux, S., Steinberg, J.G., Boussuges, A., Gole, Y., Jammes, Y.  
472 (2010). Combination of two oxidant stressors suppresses the oxidative stress and enhances  
473 the heat shock protein 27 response in healthy humans. *Metabolism* **59**, 879-886.

474 - By, Y., Durand-Gorde, J.M., Condo, J., Lejeune, P.J., Fenouillet, E., Guieu, R., Ruf, J.  
475 (2010) Monoclonal antibody-assisted stimulation of adenosine A2A receptors induces  
476 simultaneous downregulation of CXCR4 and CCR5 on CD4+ T-cells. *Hum. Immunol.* **71**,  
477 1073-1076

478 - Daniels, W.M.U., Marais, L., Stein, D.J., Russell, V. (2012). Exercise normalizes altered  
479 expression of proteins in the ventral hippocampus of rats subjected to maternal separation.  
480 *Exp. Physiol.* **97**, 239-247.

481 - Darques, J.L., Bendahan, D., Roussel, M., Giannesini, B., Tagliarini, F., Le Fur, Y.,  
482 Cozzone, P.J., Jammes, Y. (2003). Combined in situ analysis of metabolic and  
483 myoelectrical changes associated with electrically induced fatigue. *J. Appl. Physiol.* **95**,  
484 1476-1484.

- 485 - Darques, J.L. and Jammes, Y. (1997). Fatigue-induced changes in group IV muscle  
486 afferent activity: differences between high- and low-frequency electrically induced  
487 fatigues. *Brain Res.* **750**, 47-54.
- 488 - Decherchi, P., Darques, J.L., Jammes, Y. (1998). Modifications of afferent activities from  
489 tibialis anterior muscle in rat by tendon vibrations, increase of interstitial potassium or  
490 lactate concentration and electrically-induced fatigue. *J. Periph. Nerv. Syst.* **3**, 267-276.
- 491 - Decherchi, P., Dousset, E., Jammes, Y. (2007). Respiratory and cardiovascular responses  
492 evoked by tibialis anterior muscle afferent fibers in rats. *Exp. Brain Res.* **183**, 299-312.
- 493 - Degtyarenko, A.M. and Kaufman, M.P. (2002). Spinoreticular neurons that receive group  
494 III input are inhibited by MLR stimulation. *J. Appl. Physiol.* **93**, 92-98.
- 495 - Delliaux, S., Brerro-Saby, C., Steinberg, J.G., Jammes, Y. (2009). Reactive oxygen  
496 species activate the group IV muscle afferents in resting and exercising muscle in rats.  
497 *Pflugers Arch* **459**, 143-150.
- 498 - Ganote, C. and Armstrong, S. (1993). Ischaemia and the myocyte cytoskeleton: review  
499 and speculation. *Cardiovasc. Res.* **27**, 1387-1403.
- 500 - Garland, S.J. and Kaufman, M.P. (1995). Role of muscle afferents in the inhibition of  
501 motoneurons during fatigue. *Adv. Exp. Med. Biol.* **384**, 271-278.
- 502 - Graf, G.L.A., Hudson, A.J., Strickland, K.P. (1965). Changes in the relative amounts of  
503 ascorbic acid and glycogen in denervated rat gastrocnemius muscle. *Biochem. Cell. Biol.*  
504 **43**, 705-710.
- 505 - Hashimoto, K., Tomitaka, S., Bi, Y., Narita, Y., Iyo, M. (1997). Rolipram, a selective  
506 phosphodiesterase type-IV inhibitor, prevents induction of heat shock protein HSP-70 and  
507 HSP-79 mRNA in rat retrosplenial cortex by the NMDA receptor antagonist dizocilpine.  
508 *Eur. J. Neurosci.* **9**, 1891-1901.

- 509 - Huang, W., Fileta, J.B., Filippopoulos, T., Ray, A., Dobberfuhr, A., Grosskreutz, C.L.  
510 (2007). Hsp27 phosphorylation in experimental glaucoma. *Invest. Ophthalmol. Vis. Sci.* **48**,  
511 4129-4135.
- 512 - Huey, K.A., Hyatt, J.P.K., Zhong, H., Roy, R.R. (2005). Effects of innervation state on  
513 Hsp24 content and phosphorylation in inactive rat plantaris muscle. *Acta Physiol. Scand.*  
514 **185**, 219-227.
- 515 - Huey, K.A., Burdette, S., Zhong, H., Roy, R.R. (2010). Early response of heat shock  
516 proteins to functional overload of the soleus and plantaris in rats and mice. *Exp. Physiol.*  
517 **95**, 1145-1155.
- 518 - Jammes, Y., Steinberg, J.G., Delliaux, S., Brégeon, F. (2009). Chronic fatigue syndrome  
519 combines increased exercise-induced oxidative stress and reduced cytokine and Hsp  
520 responses. *J. Intern. Med.* **266**, 196-206.
- 521 - Johnson, J.D., Campisi, J., Sharkey, C.M., Kennedy, S.L., Nickerson, M., Fleshner, M.  
522 (2005). Adrenergic receptors mediate stress-induced elevations in extracellular Hsp72. *J.*  
523 *Appl. Physiol.* **99**, 1789-1795.
- 524 - Kato, K., Ito, H., Kamei, K., Iwamoto, I., Inaguma, Y. (2002). Innervation-dependent  
525 phosphorylation and accumulation of  $\alpha$ B-crystallin and HSP27 as soluble complexes in  
526 disused muscle. *The FASEB Journal* **16**, 1432-1434.
- 527 - Kaufman, M.P. and Hayes, S.G. (2002). The exercise pressor reflex. *Clin. Auton. Res.* **12**,  
528 429-439.
- 529 - Koba, S., Yoshida, T., Hayashi, N. (2006). Renal sympathetic and circulatory responses  
530 to activation of the exercise pressor reflex in rats. *Exp. Physiol.* **91**, 111-119.
- 531 - Lancaster, G.I., Moller, K., Nielsen, B., Secher, N.H., Febbraio, M.A., Nibo, L. (2004).  
532 Exercise induces the release of heat shock protein 72 from the human brain in vivo. *Cell*  
533 *Stress Chaperones* **9**, 276-280.

- 534 - Ling, L.J., Honda, T., Shimada, Y., Ozaki, N., Shiraishi, Y., Sugiura, Y. (2003). Central  
535 projection of unmyelinated (C) primary afferent fibers from gastrocnemius muscle in the  
536 guinea pig. *J. Comp. Neurol.* **461**, 140-150.
- 537 - Locke, M., Noble, E.G., Atkinson, B.G. (1990). Exercising mammals synthesize stress  
538 proteins. *Am. J. Physiol. Cell. Physiol.* **258**, C723-C779.
- 539 - Maickel, R.P. (1960). A rapid procedure for the determination of adrenal ascorbic acid:  
540 application of the Sullivan and Clarke method to tissues. *Anal. Biochem.* **1**, 498-501.
- 541 - Matt, P., Fu, Z., Carrel, T., Huso, D.L., Dirnhofer, S., Lefkovits, I., Zerkowski, H.R., Van  
542 Eyk, J.E. (2007). Proteomic alterations in heat shock protein 27 and identification of  
543 phosphoproteins in ascending aortic aneurysm associated with bicuspid and tricuspid aortic  
544 valve. *J. Mol. Cell. Cardiol.* **43**, 792-801.
- 545 - McArdle, A., Pattwell, D., Vasilaki, A., Griffiths, R.D., Jackson, M.J. (2001). Contractile  
546 activity-induced oxidative stress: cellular origin and adaptive response. *Am. J. Physiol.*  
547 *Cell. Physiol.* **280**, C621-C627.
- 548 - McArdle, A. and Jackson, M. (2002). Stress proteins and exercise-induced muscle  
549 damage. In *Exercise and Stress Response. The Role of Stress Proteins* (ed. M. Locke and  
550 E.G. Noble), pp 137-150, Boca Raton, FL: CRC.
- 551 - Morton, J.P., Don P.M., Cable, N.T., Bongers, T., Griffiths, R.D., Campbell, I.T., Evans,  
552 L., Kayani, A., McArdle, A., Drust, B. (2006). Time course and differential response of the  
553 major heat shock protein families in human skeletal muscle following acute nondamaging  
554 treadmill exercise. *J. Appl. Physiol.* **101**, 176-182.
- 555 - Paulsen, G., Vissing, K., Kalkhovde, J.M., Ugelstad, I., Bayer, M.L., Kadi, F., Schjerling,  
556 P., Hallén, J., Raastad, T. (2007). Maximal eccentric exercise induces a rapid accumulation  
557 of small heat shock proteins on myofibrils and a delayed HSP70 response in humans. *Am.*  
558 *J. Physiol. Regul. Integr. Comp. Physiol.* **293**, R844-853.

- 559 - Rotto, D.M. and Kaufman, M.P. (1988). Effect of metabolic products of muscular  
560 contraction on discharge of group III and IV afferents. *J. Appl. Physiol.* **64**, 2306-2313.
- 561 - Rowell, L.B. and O'Leary, D.S. (1990). Reflex control of the circulation during exercise:  
562 chemoreflexes and metaboreflexes. *J. Appl. Physiol.* **69**, 407-418.
- 563 - Schmitt, E., Gehrmann, M., Brunet, M., Multhoff, G., Garrido, C. (2007). Intracellular  
564 and extracellular functions of heat shock proteins: repercussions in cancer therapy. *J.*  
565 *Leukoc. Biol.* **81**,15-27.
- 566 - Skidmore, R., Gutierrez, J.A., Guerrio, V., Kregal, K.C. (1995). HSP70 induction during  
567 exercise and heat stress in rats: role of internal temperature. *Am. J. Physiol. Regul. Integr.*  
568 *Comp. Physiol.* **268**, R92-R97.
- 569 - Steinberg, J.G., Faucher, M., Guillot, C., Kipson, N., Badier, M., Jammes, Y. (2004).  
570 Depressed fatigue-induced oxidative stress in chronic hypoxemic humans and rats. *Respir.*  
571 *Physiol. Neurobiol.* **141**, 179-189.
- 572 - Tupling, A.R., Bombardier, E., Stewart, R.D., Vigna, C., Aqai, A.E. (2007). Muscle fiber  
573 type-specific response to HSP70 expression in human quadriceps following acute isometric  
574 exercise. *J. Appl. Physiol.* **103**, 2105-2111.
- 575 - Uchiyama, M. and Mihara, M. (1978). Determination of malonaldehyde precursor in  
576 tissues by thiobarbituric acid test. *Anal. Biochem.* **86**, 271-278.
- 577 - Walsh, R.C., Koukoulas, I., Garnham, A., Moseley, P.L., Hargreaves, M., Febbraio, M.A.  
578 (2001). Exercise increases serum HSP-72 in humans. *Cell Stress Chaperones* **6**, 386-393.
- 579 - Whitham, M. and Fortes, M.B. (2008). Heat shock protein 72: release and biological  
580 significance during exercise. *Frontiers in Bioscience* **13**, 1328-1339.
- 581 - Wilson, J.X., Dixon, S.J., Yu, J., Nees, S., Tyml, K. (1996). Ascorbate uptake by  
582 microvascular endothelial cells of rat skeletal muscle. *Microcirculation* **3**, 211-221.
- 583



584 **Legends of illustrations:**

585 **Figure 1:** Tracings of muscle force recorded in both tibialis anterior (TA) muscles during  
586 the 10-min muscle stimulation of one TA and the blood pressure measured in a carotid  
587 artery. Panels A and B respectively show the responses to the stimulation of an innervated  
588 or denervated TA muscle. Mean values of systolic and diastolic blood pressures measured  
589 before the stimulation bout, at the instant of maximal variations, and 1 min after the  
590 stimulation had ended are indicated.

591 **Figure 2:** Intramuscular concentrations of TBARS and RAA measured in resting TA  
592 muscles (C10 and C60) and after the stimulation bout in the stimulated (St10 and St60) and  
593 contralateral TA muscles (Contra 10 and Contra 60) in series in which the nerve supply to  
594 the stimulated muscle was left intact or suppressed. Asterisks denote significant differences  
595 with controls (\*  $p < 0.05$ ; \*\*  $p < 0.01$ ; \*\*\*  $p < 0.001$ ).

596 **Figure 3:** Absolute values of HSP25 and HSP70 protein levels given by ELISA in the  
597 three experimental conditions: 1) stimulation of innervated TA / innervated contralateral  
598 resting TA (A and B), 2) stimulation of denervated TA / innervated contralateral resting  
599 TA (C and D), 3) stimulation of innervated TA / denervated contralateral resting TA (E  
600 and F). In each panel, we reported control HSP levels in resting TA muscles (C10, C60) )  
601 and HSP content measured after the stimulation bout in the stimulated (St10 and St60) and  
602 contralateral TA muscles (Contra 10 and Contra 60). Asterisks denote significant  
603 differences between stimulation-induced HSP changes in stimulated or contralateral  
604 muscles and the corresponding control values (\*  $p < 0.05$ ; \*\*  $p < 0.01$ ; \*\*\*  $p < 0.001$ ).

605 **Figure 4:** HSP25 content given by immunoassays in innervated contralateral resting TA  
606 muscles, sampled 10 min after electrical stimulation of the pair stimulated TA, plotted  
607 against the force decay in the fatigued muscle. No significant correlation was found when  
608 the nerve supply to the stimulated muscle was suppressed.

609 **Figure 5:** ELISA measurement of HSP25 and HSP70 contents in different tissues  
610 (*extensor digitorum longus* or EDL, diaphragm, kidney, brain) sampled 10 or 60 min after  
611 electrical stimulation of one innervated or denervated tibialis anterior (TA) muscle.  
612 Asterisks denote significant differences between stimulation-induced HSP changes (Test  
613 condition) and the corresponding control values (C10 or C60) (\*\*  $p < 0.01$ ; \*\*\*  $p < 0.001$ ).

614 **Figure 6:** Example of measurements of HSP25 and HSP70 content using Western blotting  
615 in one stimulated innervated (left panels) or denervated (right panels) *tibialis anterior* (TA)  
616 muscles (St) and the resting contralateral pair muscles (Contra). Sampling was performed  
617 10 min or 60 min after the stimulation bout had ended for HSP25 and HSP70, respectively,  
618 i.e., at the instants of major changes in these protein levels. The relative HSP variations  
619 after TA stimulation are expressed in percentage of baseline values measured in resting  
620 TA.

621 **Figure 7:** Measurements of HSP25 and HSP70 using Western blotting in contralateral TA  
622 and EDL muscles, diaphragm, kidney, and brain 10 min (Test 10) and 60 min (Test 60)  
623 after unilateral stimulation of an innervated (left panels) or denervated (right panels) TA  
624 muscle. Asterisks denote significant differences between stimulation-induced HSP changes  
625 (Test condition) and the corresponding control values measured at the 10<sup>th</sup> min (C10) or  
626 60<sup>th</sup> min (C60) (\*  $p < 0.05$ ; \*\*  $p < 0.01$ ; \*\*\*  $p < 0.001$ ).

627

628 **Table 1:** Control values of HSP25 and HSP70 contents measured by immunoassays  
 629 (ELISA) in the different tissues sampled at the 10<sup>th</sup> or 60<sup>th</sup> min when one limb was  
 630 innervated or denervated. Symbol # indicates significant effect of denervation compared  
 631 to the intact preparation (# p < 0.05; ## p < 0.01). Symbol \$ indicate significant difference  
 632 in HSP values measured at the 60<sup>th</sup> min compared to the 10<sup>th</sup> min (\$ p < 0.05; \$\$ p < 0.01).  
 633 Values are the mean  $\pm$  SEM.

|     | Rat number                       | 10 <sup>th</sup> min                 |              | 60 <sup>th</sup> min |               |                |
|-----|----------------------------------|--------------------------------------|--------------|----------------------|---------------|----------------|
|     |                                  | HSP25                                | HSP70        | HSP25                | HSP70         |                |
|     |                                  | ng.mg <sup>-1</sup> proteins content |              |                      |               |                |
| 637 | Intact nerves                    | 16                                   | 13 $\pm$ 1   | 54 $\pm$ 4           | 16 $\pm$ 2 \$ | 70 $\pm$ 5 \$  |
| 638 | <i>Tibialis anterior</i>         |                                      |              |                      |               |                |
| 639 | Severed nerves                   | 16                                   | 24 $\pm$ 3 # | 85 $\pm$ 4 ##        | 17 $\pm$ 2 \$ | 68 $\pm$ 4 \$  |
| 640 | Intact nerves                    | 8                                    | 40 $\pm$ 4   | 62 $\pm$ 9           | 46 $\pm$ 3 \$ | 80 $\pm$ 11 \$ |
| 641 | <i>Extensor digitorum longus</i> |                                      |              |                      |               |                |
| 642 | Severed nerves                   | 8                                    | 49 $\pm$ 4 # | 75 $\pm$ 9 #         | 51 $\pm$ 3 \$ | 92 $\pm$ 10 \$ |
| 643 | Intact nerves                    | 8                                    | 37 $\pm$ 9   | 41 $\pm$ 6           | 48 $\pm$ 7    | 45 $\pm$ 6     |
| 644 | Diaphragm                        |                                      |              |                      |               |                |
| 645 | Severed nerves                   | 8                                    | 42 $\pm$ 6   | 45 $\pm$ 6           | 52 $\pm$ 10   | 43 $\pm$ 8     |
| 646 | Intact nerves                    | 8                                    | 65 $\pm$ 3   | 57 $\pm$ 7           | 56 $\pm$ 9    | 51 $\pm$ 7     |
| 647 | Kidney                           |                                      |              |                      |               |                |
| 648 | Severed nerves                   | 8                                    | 68 $\pm$ 5   | 51 $\pm$ 7           | 58 $\pm$ 3    | 49 $\pm$ 11    |
| 649 | Intact nerves                    | 8                                    | 43 $\pm$ 3   | 79 $\pm$ 16          | 44 $\pm$ 6    | 70 $\pm$ 5     |
| 650 | Brain                            |                                      |              |                      |               |                |
| 651 | Severed nerves                   | 8                                    | 40 $\pm$ 5   | 70 $\pm$ 15          | 46 $\pm$ 6    | 65 $\pm$ 10    |

652

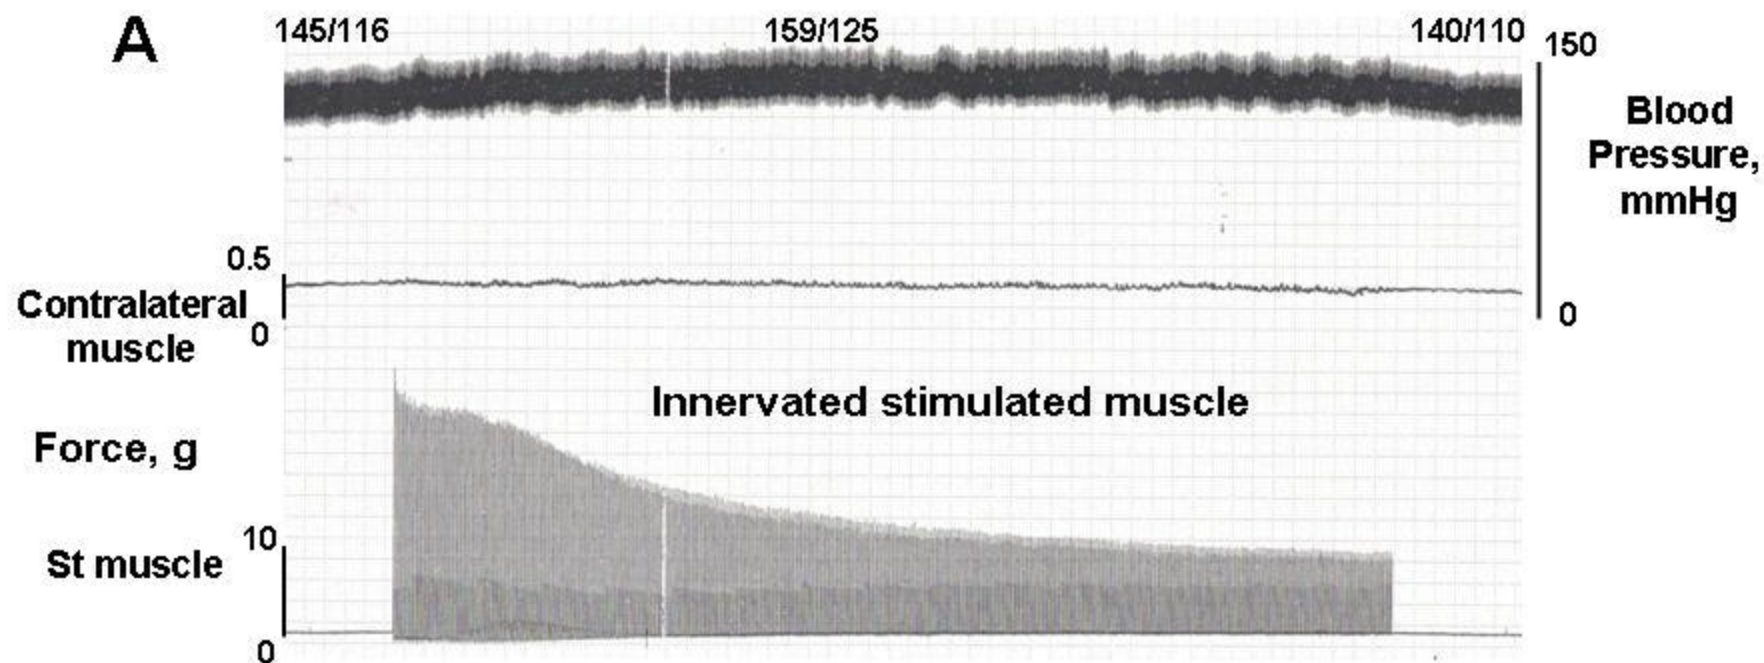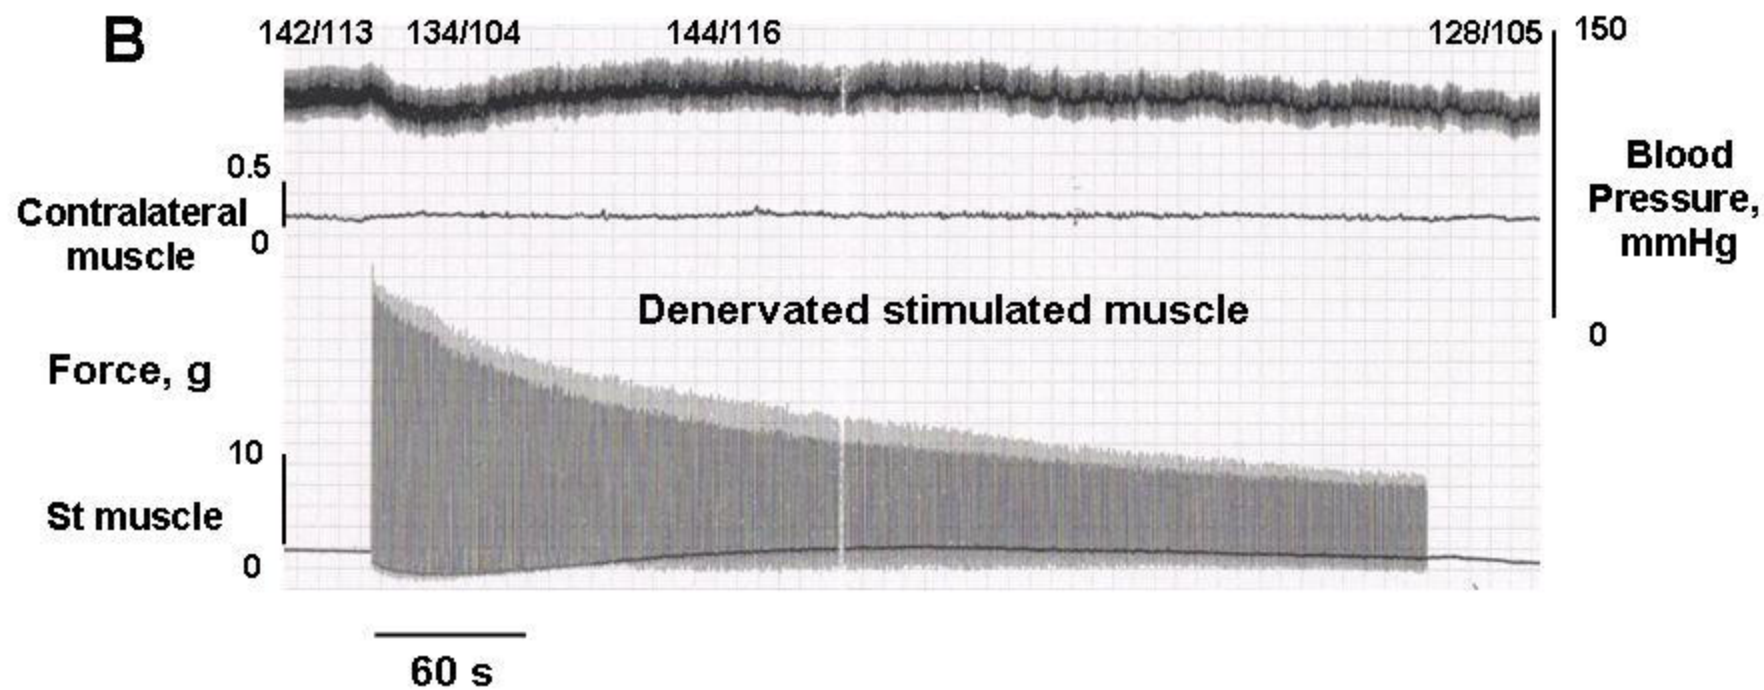

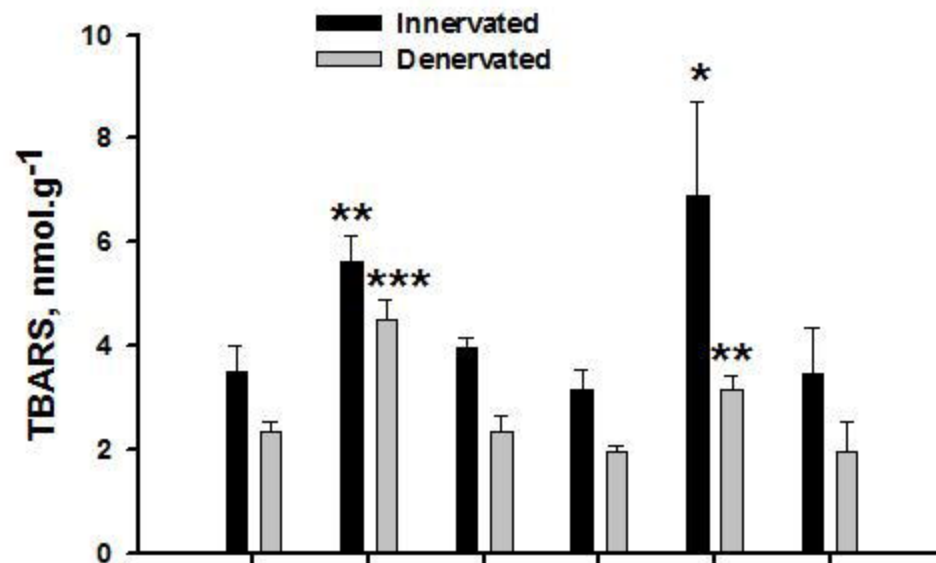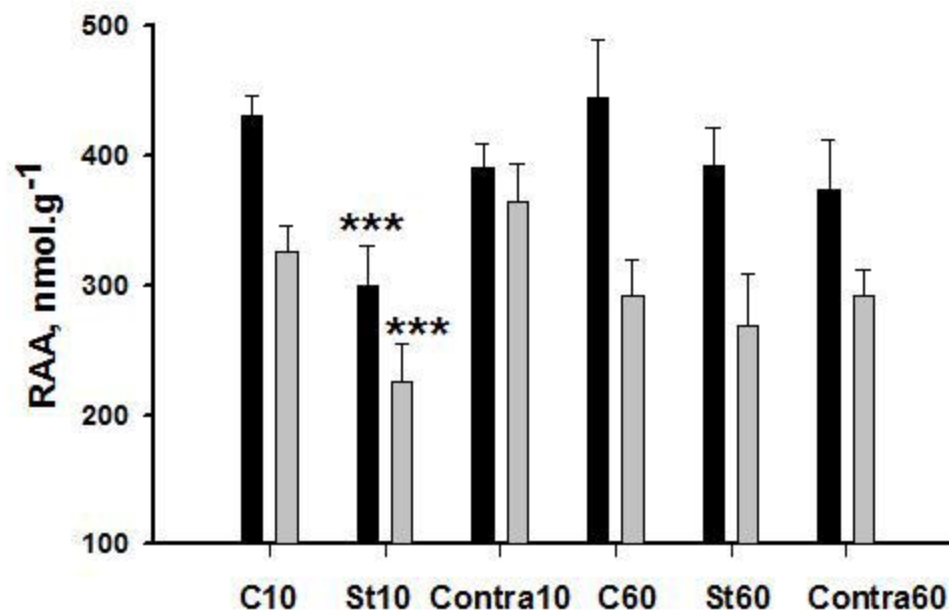

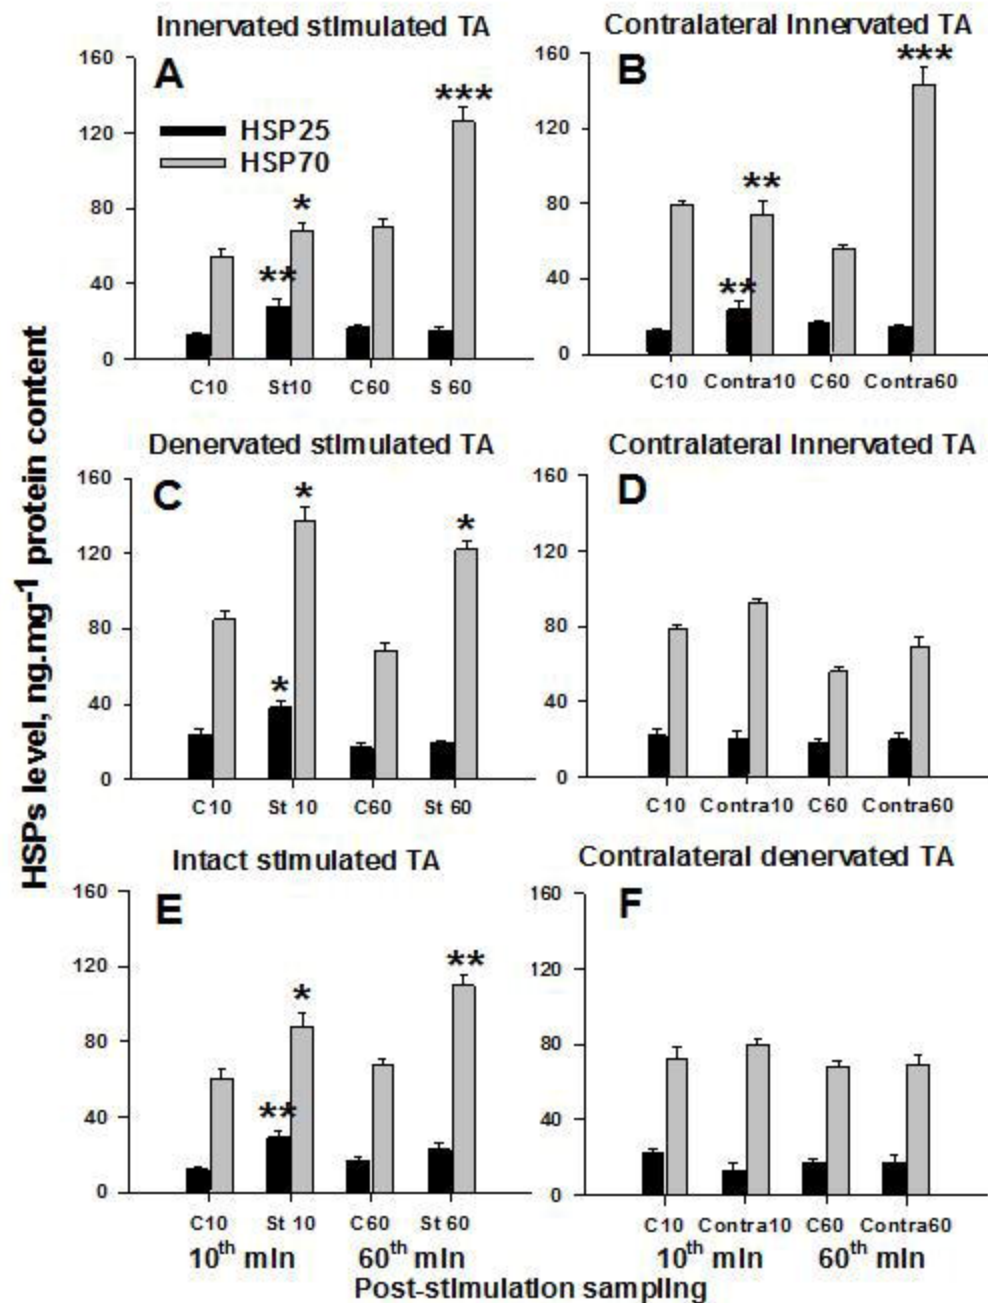

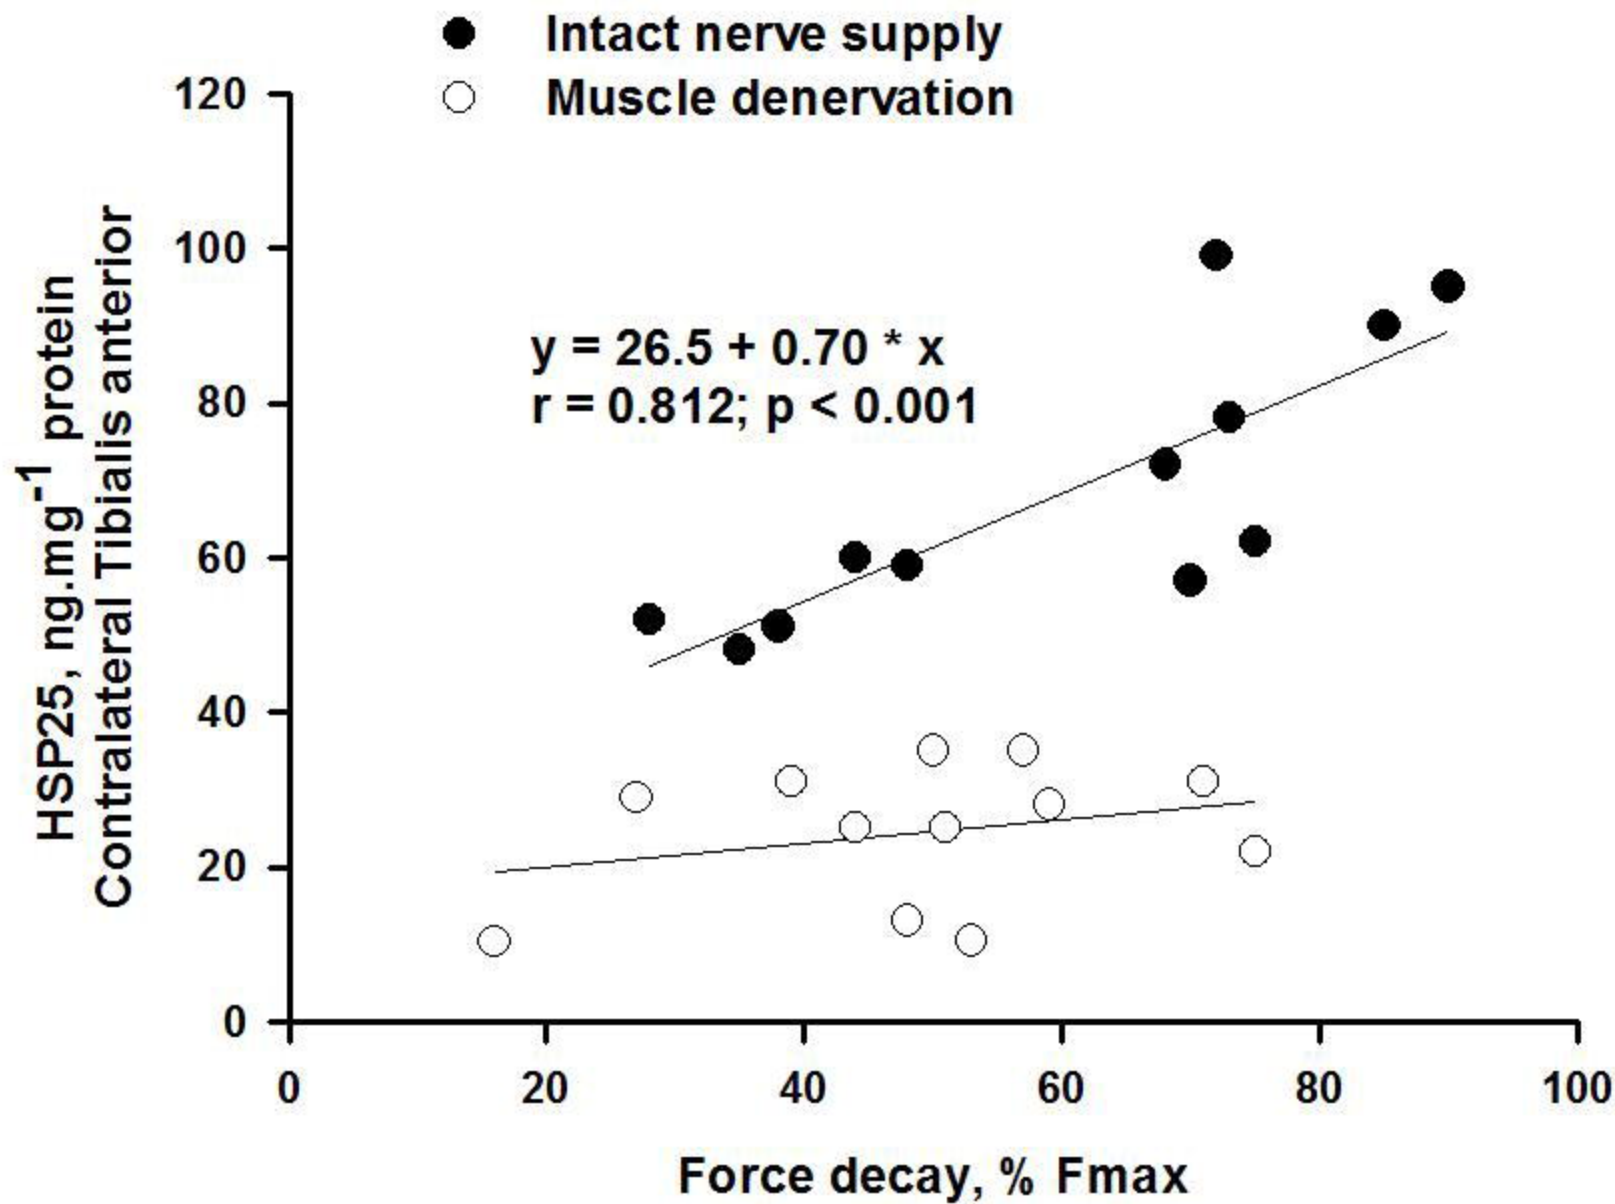

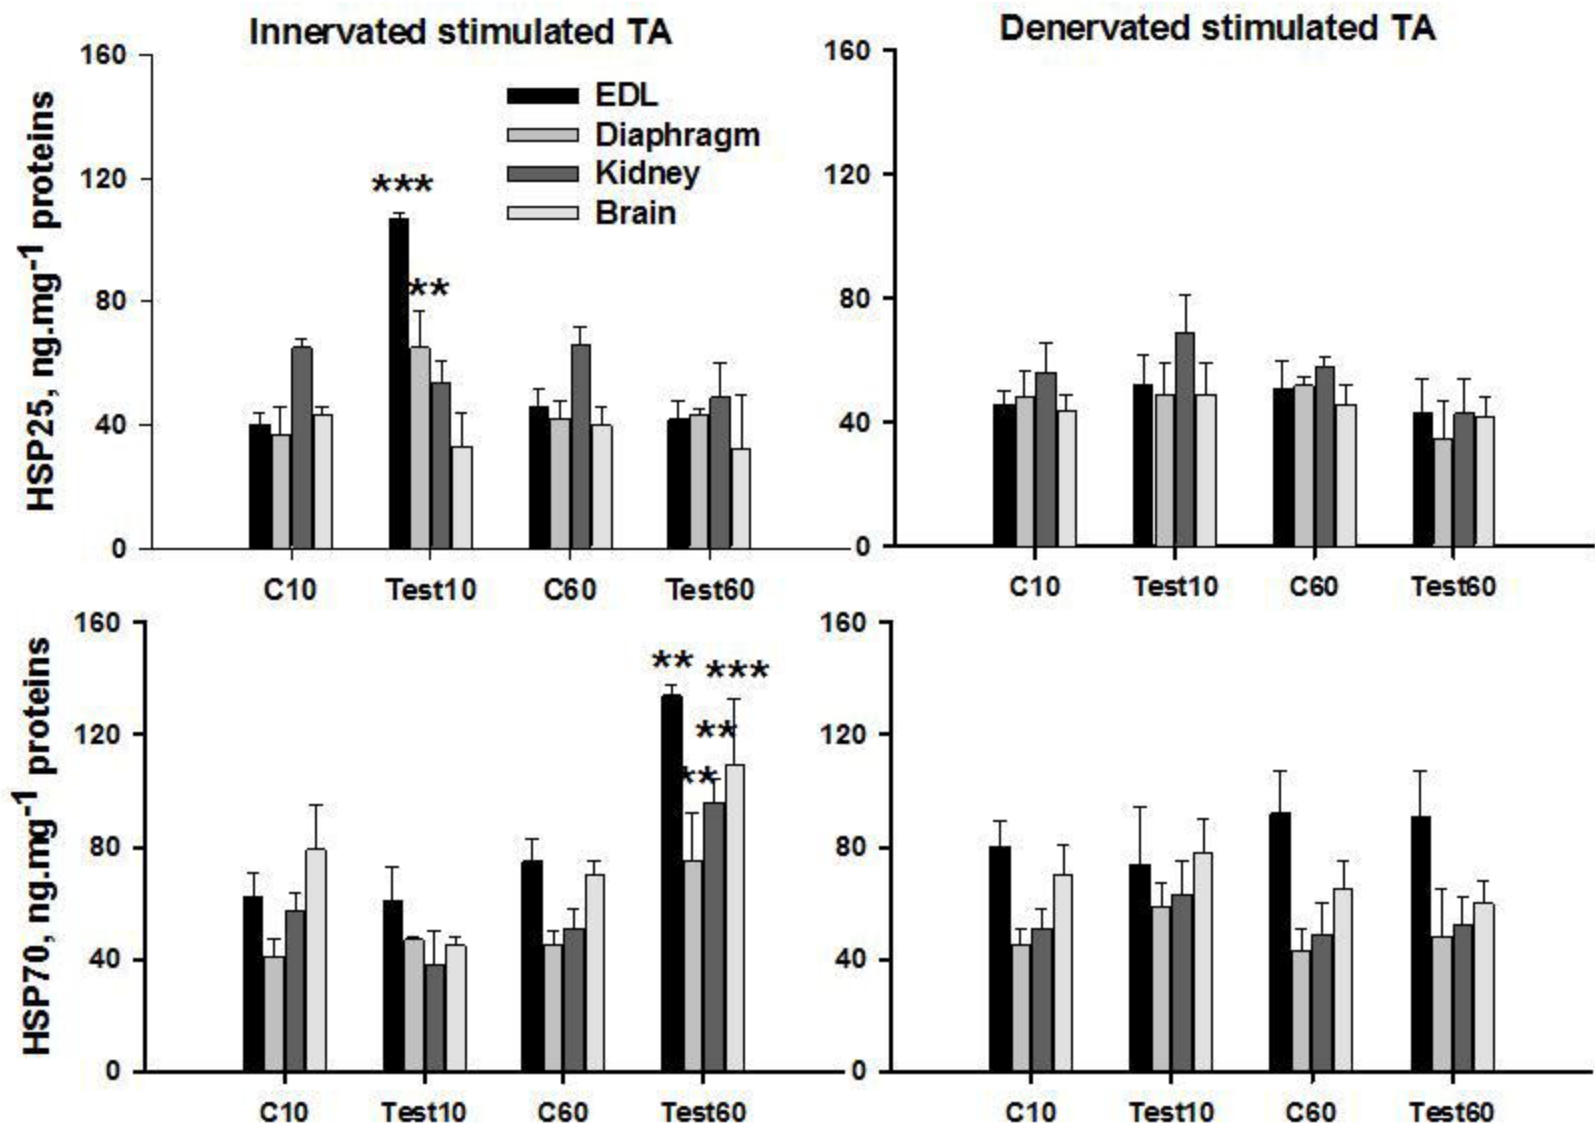



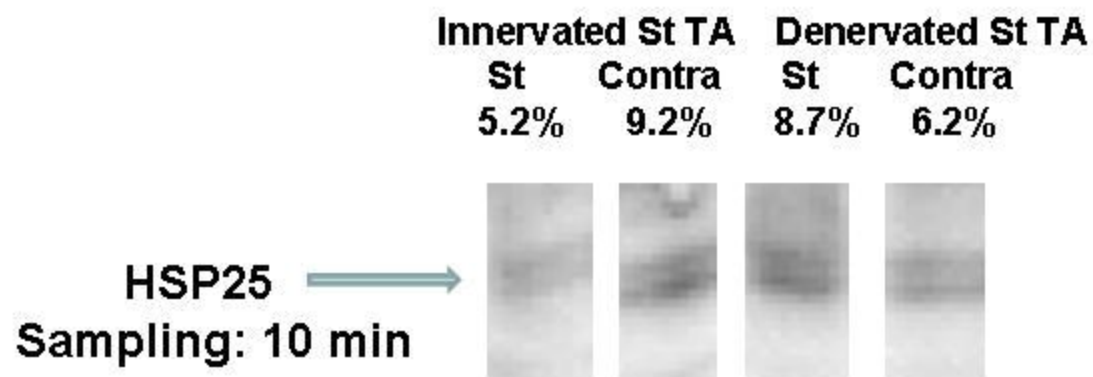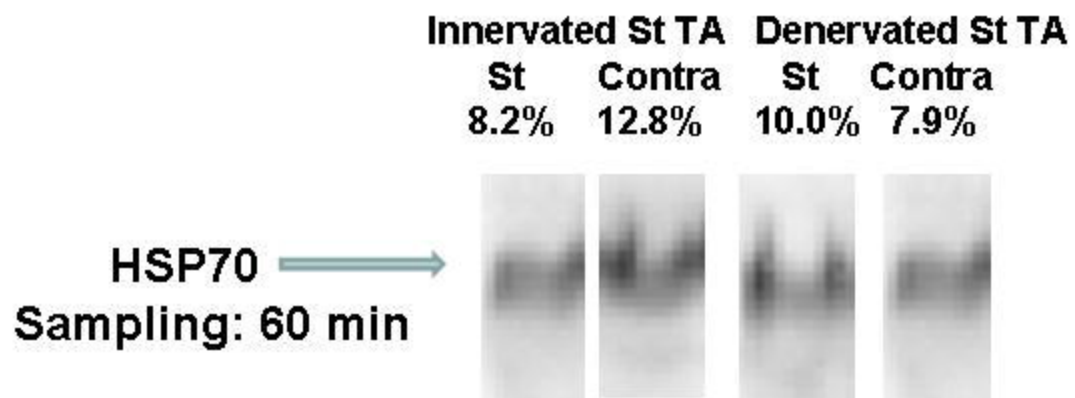

**Innervated stimulated TA**

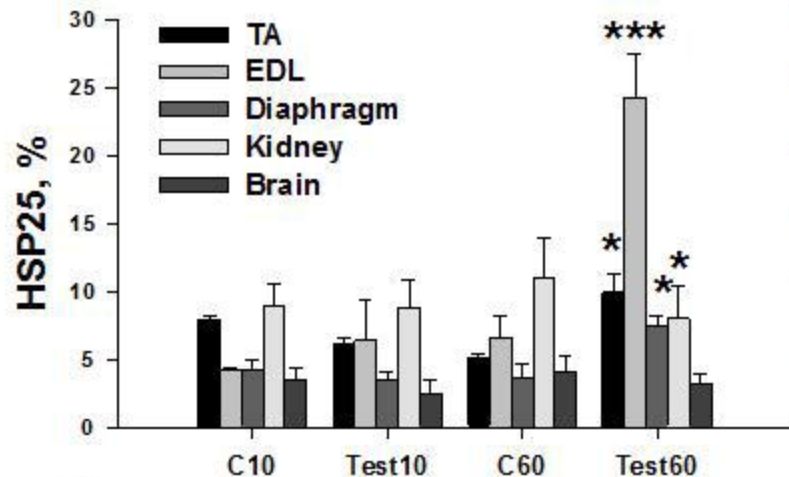

**Denervated stimulated TA**

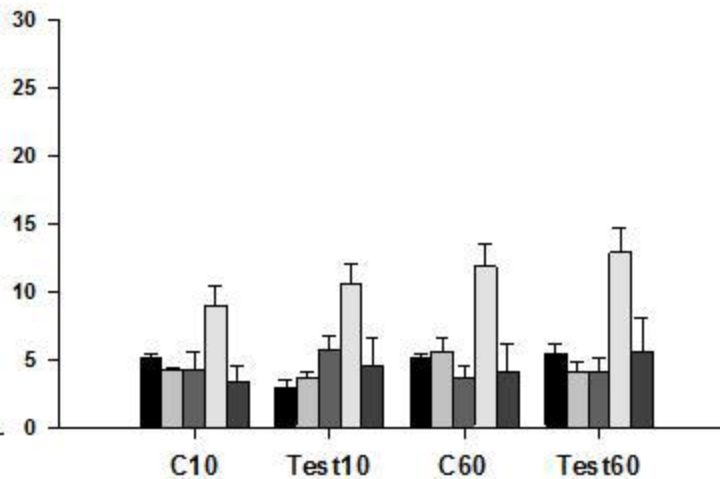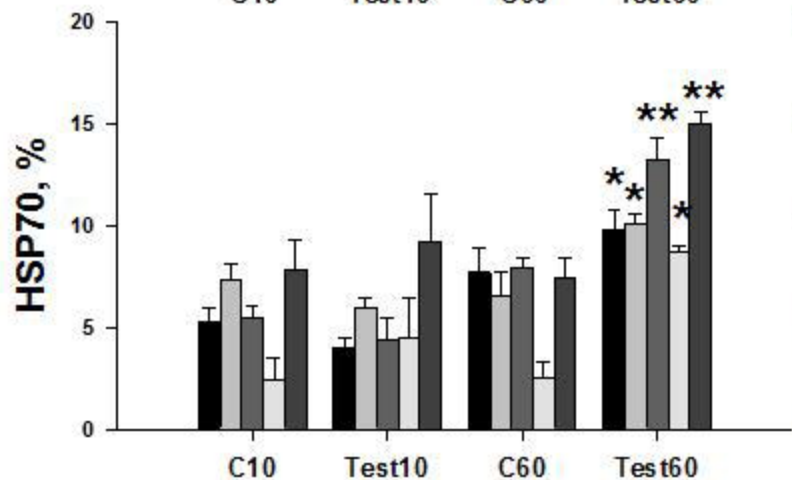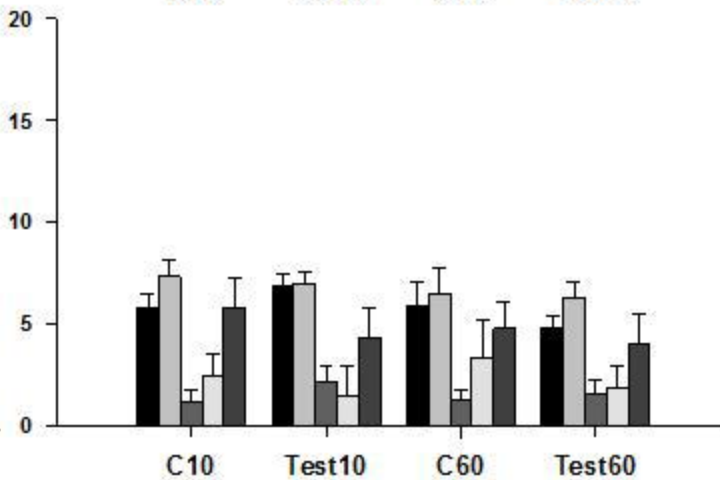

Source: https://cob.silverchair.com/jeb/article-pdf/doi/10.1242/jeb.074427/2036039/jeb_074427.pdf
